# Supplementary material for: Cannabidiol’s Multifactorial Mechanisms Has Therapeutic Potential for Aneurysmal Subarachnoid Hemorrhage: a Review
Source: PubMed Central journal article supplement (PMC10160197; doi:10.1007/s12975-022-01080-x), 2022-09-15
Supplement: 12975_2022_1080_MOESM1_ESM.pdf [file 12975_2022_1080_MOESM1_ESM.pdf]

# **Cannabidiol's Multifactorial Mechanisms has Therapeutic Potential for Aneurysmal Subarachnoid Hemorrhage: A Review**

Journal: Translational Stroke Research

Nicholas Henry<sup>1</sup>, Justin F. Fraser<sup>2-4,6,7</sup>, Joseph Chappell<sup>8</sup>, Tamra Langley<sup>5</sup>, and Jill M. Roberts<sup>2-3,7\*</sup>

College of Medicine<sup>1</sup> Departments of Neurosurgery<sup>2</sup>, Neuroscience<sup>3</sup>, Radiology<sup>4</sup>, Anesthesiology<sup>5</sup>, Neurology<sup>6</sup>, and Center for Advanced Translational Stroke Science<sup>7</sup>, College of Pharmacy Department of Pharmaceutical Sciences<sup>8</sup>, University of Kentucky, Lexington, KY, USA

\*Corresponding Author      Jill M. Roberts  
[Jill.roberts@uky.edu](mailto:Jill.roberts@uky.edu)

**Table OR1: Referenced Articles Demonstrating CBD's Anti-Inflammatory Effects**

|                  | Reference Article #                     | Model                    | CBD Molecular/Cellular Interactions and Physiologic effects | Anatomical Location/Cell Type Evaluated   | Specific Pathology being Evaluated      | ROA                    | Dosage         |
|------------------|-----------------------------------------|--------------------------|-------------------------------------------------------------|-------------------------------------------|-----------------------------------------|------------------------|----------------|
| <b>Microglia</b> |                                         |                          |                                                             |                                           |                                         |                        |                |
|                  | Hassan, 2014. <sup>42</sup>             | Male C57BL Mice          | ↑TRPV1/2, ↑Microglia Phagocytosis                           | Isolated Brain and Spinal Cord BV-2 Cells | N/A                                     | <i>in vitro</i>        | 10μM           |
|                  | Juknat, 2013. <sup>47</sup>             | Cultured Mice Cells      | Many, See article*                                          | BV-2 Cells Assay                          | <i>E. Coli</i> LPS induced inflammation | <i>in vitro</i>        | 10μM           |
|                  | Kozela, 2010. <sup>48</sup>             | Cultured Mice Cells      | ↓IL-1β/6, ↓IFN-β, ↓NF-κβ, ↑STAT3, ↓STAT1                    | BV-2 Cells Assay                          | <i>E. Coli</i> LPS induced inflammation | <i>in vitro</i>        | 10μM           |
|                  | Liou, 2008. <sup>49</sup>               | Newborn Rats             | ↓Adenosine uptake, ↓TNF-α,                                  | Retinal Microglia Cells Assay; Retina     | LPS induced inflammation                | <i>in vitro</i> ; i.p. | 1μM; 1mg/kg    |
|                  | Dos-Santos-Pereira, 2020. <sup>51</sup> | Cultured Mice Cells      | ↓ROS, ↓NF-κβ, ↓Microglia Activity                           | Microglia Cells Assay                     | LPS induced inflammation                | <i>in vitro</i>        | 1-10μM         |
|                  | Hayakawa, 2008. <sup>52</sup>           | Male ddY Mice            | ↓Microglia activity, ↓HMBG1, ↓MPO activity                  | Brain                                     | Left MCA Occlusion                      | i.p.                   | 0.1, 1, 3mg/kg |
|                  | Mecha, 2013. <sup>53</sup>              | Female SJL/J Mice        | ↓VCAM, ↓CCL2/5, ↓TNF-α, ↓IL-1β, ↓Microglia Activity         | Brain and Spinal Cord                     | demyelinating disease                   | i.p.                   | 5mg/kg         |
|                  | Martín-Moreno, 2011. <sup>54</sup>      | Cultured Mice Cells      | Microglial Activity Modulation                              | Microglia Cells Assay                     | N/A                                     | <i>In vitro</i>        | 100nM          |
|                  |                                         | C56/B16 Mice             | ↓IL-6 mRNA, ↓cognitive deficit                              | Brain                                     | Alzheimer's disease                     | i.p.                   | 20mg/kg        |
|                  | Carrier, 2006. <sup>55</sup>            | Cultured Mice Cells      | ↓ Adenosine and ↓ Thymidine Uptake into Microglia           | Bone Marrow Microglia and Macrophages     | N/A                                     | <i>in vitro</i>        | 0.1-3μM        |
|                  |                                         | Male ICR or C57BL/6 Mice | ↓ TNF-α                                                     | Serum                                     | LPS induced inflammation                | i.p.                   | 1 mg/kg        |
|                  | Juknat, 2012. <sup>56</sup>             | Cultured Mice Cells      | Many, See article*                                          | BV-2 Cells Assay                          | N/A                                     | <i>in vitro</i>        | 10μM           |
|                  | Rimmerman, 2013. <sup>57</sup>          | Cultured Mice Cells      | ↓ VDAC1, ↑BV-2 i[Ca], ↑BV-2 Cell Death                      | BV-2 Cells Assay                          | N/A                                     | <i>in vitro</i>        | 5μM; 10μM      |

| Adhesion Molecules  |                                   |                      |                                                                                         |                                        |                                         |                 |                        |
|---------------------|-----------------------------------|----------------------|-----------------------------------------------------------------------------------------|----------------------------------------|-----------------------------------------|-----------------|------------------------|
|                     | Mecha, 2013. <sup>53</sup>        | Female SJL/J Mice    | ↓VCAM, ↓TNF- $\alpha$ , ↓IL-1 $\beta$ , ↓Microglia Activity                             | Brain & Spinal Cord                    | demyelinating disease                   | i.p.            | 5mg/kg                 |
|                     | Hind, 2016. <sup>60</sup>         | Cultured Human Cells | ↓ OGD-induced ↑ in BBB permeability                                                     | Brain Endothelium and Astrocytes       | Oxygen-Glucose Deprivation              | <i>in vitro</i> | 10 $\mu$ M             |
|                     | Mukhopadhyay, 2011. <sup>65</sup> | Male C57/BL6J Mice   | ↓NF- $\kappa$ B, ↓TNF- $\alpha$ , ↓ICAM-1, ↓neutrophil infiltration, ↓DNA fragmentation | Liver                                  | Ischemia/Reperfusion                    | i.p.            | 3, 10mg/kg             |
|                     | Rajesh, 2007. <sup>66</sup>       | Cultured Human Cells | ↓NF- $\kappa$ B, ↓monocyte migration                                                    | Human Coronary Artery Epithelial Cells | High Glucose Exposure                   | <i>in vitro</i> | 4 $\mu$ M, 0-6 $\mu$ M |
|                     |                                   | Cultured Human Cells | ↓superoxide, ↓VCAM-1, ↓ICAM-1                                                           | Human Coronary Artery Epithelial Cells | High Glucose Exposure                   | <i>in vitro</i> | 4 $\mu$ M, 0-6 $\mu$ M |
|                     | Rajesh, 2010. <sup>67</sup>       | Male C57/BL6J Mice   | ↓ICAM-1, ↓VCAM-1, ↓TNF- $\alpha$ , ↓ROS, ↓caspase 3,                                    | Myocardial Tissue                      | Type 1 Diabetic Cardiomyopathy          | i.p.            | 1,10, 20mg/kg          |
|                     |                                   | Cultured Human Cells | ↓superoxide generation, ↓NF- $\kappa$ B, ↓apoptosis                                     | Cardiomyocytes                         | High Glucose Exposure                   | <i>in vitro</i> | 4 $\mu$ M              |
| <b>Interleukins</b> |                                   |                      |                                                                                         |                                        |                                         |                 |                        |
|                     | Juknat, 2013. <sup>47</sup>       | Cultured Mice Cells  | Many, See article*                                                                      | BV-2 Cells Assay                       | <i>E. Coli</i> LPS induced inflammation | <i>in vitro</i> | 10 $\mu$ M             |
|                     | Kozela, 2010. <sup>48</sup>       | Cultured Mice Cells  | ↓IL-1 $\beta$ /6, ↓IFN- $\beta$ , ↓NF- $\kappa$ B, ↑STAT3, ↓STAT1                       | BV-2 Cells Assay                       | <i>E. Coli</i> LPS induced inflammation | <i>in vitro</i> | 10 $\mu$ M             |
|                     | Mecha, 2013. <sup>53</sup>        | Female SJL/J Mice    | ↓VCAM, ↓CCL2/5, ↓TNF- $\alpha$ , ↓IL-1 $\beta$ , ↓Microglia Activity                    | Brain and Spinal Cord                  | demyelinating disease                   | i.p.            | 5mg/kg                 |
|                     | Pan, 2009. <sup>69</sup>          | C57/BL6J Mice        | ↓superoxide generation, ↓caspase 3, ↓DNA fragmentation, ↓TNF- $\alpha$ , ↓IL-1 $\beta$  | Serum and Kidney                       | Nephrotoxicity                          | i.p.            | 2.5-10mg/kg            |
|                     | Jiang, 2021. <sup>70</sup>        | Rat                  | ↓neurologic deficit, ↓BBB disruption, ↓H2O requirement, ↓TNF- $\alpha$ , ↓IL-1 $\beta$  | Brain                                  | TBI                                     | i.p.            | 5, 10, or 20 mg/kg     |

|              |                                   |                          |                                                                        |                                       |                            |                        |                              |
|--------------|-----------------------------------|--------------------------|------------------------------------------------------------------------|---------------------------------------|----------------------------|------------------------|------------------------------|
|              | Sacerdote, 2005. <sup>71</sup>    | Cultured Mice Cells      | ↑IL-12, ↓IL-10                                                         | Murine Peritoneal Macrophages         | fMLP treatment             | <i>in vitro</i>        | 0.005, 0.05, 0.5, 1, 5μM     |
|              |                                   | Swiss Male Mice          | ↑IL-12, ↓IL-10, ↓macrophage chemotaxis                                 | Harvested Peritoneal Macrophages      | fMLP treatment             | p.o. or i.p.           | 15, 30mg/kg                  |
|              | Pazos, 2013. <sup>73</sup>        | Newborn Pigs             | Prevented ↓ in GSH/Creatine ratio, ↓Glu/NAA ratio, ↓IL-1               | Brain                                 | Hypoxia-Ischemia           | i.v.                   | 1mg/kg                       |
|              | Castillo, 2010. <sup>73</sup>     | Newborn C57BL6 Mice      | ↓Glutamate, ↓caspase 9, ↓IL-6, ↓TNF-α                                  | Brain                                 | Hypoxia-Ischemia           | <i>in vitro</i>        | 0.1-1000μM (primarily 100μM) |
| <b>TNF-α</b> |                                   |                          |                                                                        |                                       |                            |                        |                              |
|              | Malfait, 2000. <sup>24</sup>      | C57/BL Mice              | ↓IFN-γ, ↓TNF-α, ↓lymphocyte proliferation, ↓ROS                        | Synovial Cells                        | Collagen-induced arthritis | o.p. & i.p.            | 5, 25mg/kg                   |
|              | Liou, 2008. <sup>49</sup>         | Newborn Rats             | ↓Adenosine uptake, ↓TNF-α,                                             | Retinal Microglia Cells Assay; Retina | LPS induced inflammation   | <i>in vitro</i> ; i.p. | 1μM; 1mg/kg                  |
|              | Mecha, 2013. <sup>53</sup>        | Female SJL/J Mice        | ↓VCAM, ↓CCL2/5, ↓TNF-α, ↓IL-1β, ↓Microglia Activity                    | Brain and Spinal Cord                 | demyelinating disease      | i.p.                   | 5mg/kg                       |
|              | Carrier, 2006. <sup>55</sup>      | Cultured Mice Cells      | ↓ Adenosine and ↓ Thymidine Uptake into Microglia                      | Bone Marrow Microglia and Macrophages | N/A                        | <i>in vitro</i>        | 0.1-3μM                      |
|              |                                   | Male ICR or C57BL/6 Mice | ↓ TNF-α                                                                | Serum                                 | LPS induced inflammation   | i.p.                   | 1 mg/kg                      |
|              | Mukhopadhyay, 2011. <sup>65</sup> | Male C57/BL6J Mice       | ↓NF-κβ, ↓TNF-α, ↓ICAM-1, ↓neutrophil infiltration, ↓DNA fragmentation  | Liver                                 | Ischemia/Reperfusion       | i.p.                   | 3, 10mg/kg                   |
|              | Pan, 2009. <sup>69</sup>          | C57/BL6J Mice            | ↓superoxide generation, ↓caspase 3, ↓DNA fragmentation, ↓TNF-α, ↓IL-1β | Serum and Kidney                      | Nephrotoxicity             | i.p.                   | 2.5-10mg/kg                  |

|                              |                                         |                          |                                                                                                |                                        |                                         |                 |                                          |
|------------------------------|-----------------------------------------|--------------------------|------------------------------------------------------------------------------------------------|----------------------------------------|-----------------------------------------|-----------------|------------------------------------------|
|                              | Jiang, 2021. <sup>70</sup>              | Rat                      | ↓neurologic deficit, ↓BBB disruption, ↓H2O requirement, ↓TNF- $\alpha$ , ↓IL-1 $\beta$         | Brain                                  | TBI                                     | i.p.            | 5, 10, or 20 mg/kg                       |
|                              | Castillo, 2010. <sup>73</sup>           | Newborn C57BL6 Mice      | ↓Glutamate, ↓caspase 9, ↓IL-6, ↓TNF- $\alpha$                                                  | Brain                                  | Hypoxia-Ischemia                        | <i>in vitro</i> | 0.1-1000 $\mu$ M (primarily 100 $\mu$ M) |
|                              | Lafuente, 2011. <sup>78</sup>           | Newborn Pigs             | ↓TNF- $\alpha$ , ↓neuronal cell death                                                          | Brain                                  | Hypoxia-Ischemia                        | i.v.            | 0.1mg/kg                                 |
|                              | Fouad, 2011. <sup>79</sup>              | Male Sprague-Dawley Rats | ↓ TNF- $\alpha$ , ↓lipid peroxidation, prevented ↓ in glutathione                              | Liver                                  | ischemia/Reperfusion                    | i.v.            | 5mg/kg                                   |
| <b>HMBG1</b>                 |                                         |                          |                                                                                                |                                        |                                         |                 |                                          |
|                              | Hayakawa, 2008. <sup>52</sup>           | Male ddY Mice            | ↓Microglia activity, ↓HMBG1, ↓MPO activity                                                     | Brain                                  | Left MCA Occlusion                      | i.p.            | 0.1, 1*, & 3mg/kg                        |
|                              | Hayakawa, 2009. <sup>81</sup>           | Male ddY Mice            | ↓HMBG1                                                                                         | Brain                                  | Left MCA Occlusion                      | i.p.            | 3mg/kg                                   |
| <b>Transcription Factors</b> |                                         |                          |                                                                                                |                                        |                                         |                 |                                          |
|                              | Juknat, 2013. <sup>47</sup>             | Cultured Mice Cells      | Many, See article*                                                                             | BV-2 Cells Assay                       | <i>E. Coli</i> LPS induced inflammation | <i>in vitro</i> | 10 $\mu$ M                               |
|                              | Kozela, 2010. <sup>48</sup>             | Cultured Mice Cells      | ↓IL-1 $\beta$ /6, ↓IFN- $\beta$ , ↓NF- $\kappa$ $\beta$ , ↑STAT3, ↓STAT1                       | BV-2 Cells Assay                       | <i>E. Coli</i> LPS induced inflammation | <i>in vitro</i> | 10 $\mu$ M                               |
|                              | Dos-Santos-Pereira, 2020. <sup>51</sup> | Cultured Mice Cells      | ↓ROS, ↓NF- $\kappa$ $\beta$ , ↓Microglia Activity                                              | Microglia Cells Assay                  | LPS induced inflammation                | <i>in vitro</i> | 1-10 $\mu$ M                             |
|                              | Mukhopadhyay, 2011. <sup>65</sup>       | Male C57/BL6J Mice       | ↓NF- $\kappa$ $\beta$ , ↓TNF- $\alpha$ , ↓ICAM-1, ↓neutrophil infiltration, ↓DNA fragmentation | Liver                                  | Ischemia/Reperfusion                    | i.p.            | 3, 10mg/kg                               |
|                              | Rajesh, 2007. <sup>66</sup>             | Cultured Human Cells     | ↓NF- $\kappa$ $\beta$ , ↓monocyte migration                                                    | Human Coronary Artery Epithelial Cells | High Glucose Exposure                   | <i>in vitro</i> | 4 $\mu$ M, 0-6 $\mu$ M                   |
|                              |                                         | Cultured Human Cells     | ↓superoxide, ↓VCAM-1, ↓ICAM-1                                                                  | Human Coronary Artery Epithelial Cells | High Glucose Exposure                   | <i>in vitro</i> | 4 $\mu$ M, 0-6 $\mu$ M                   |

|  |                             |                          |                                                            |                   |                                   |                 |                  |
|--|-----------------------------|--------------------------|------------------------------------------------------------|-------------------|-----------------------------------|-----------------|------------------|
|  | Rajesh, 2010. <sup>67</sup> | Male<br>C57/BL6J<br>Mice | ↓ICAM-1, ↓VCAM-1,<br>↓TNF- $\alpha$ , ↓ROS, ↓caspase<br>3, | Myocardial Tissue | Type 1 Diabetic<br>Cardiomyopathy | i.p.            | 1,10,<br>20mg/kg |
|  |                             | Cultured<br>Human Cells  | ↓superoxide generation,<br>↓NF- $\kappa\beta$ , ↓apoptosis | Cardiomyocytes    | High Glucose<br>Exposure          | <i>in vitro</i> | 4 $\mu$ M        |

**Table OR2: Referenced Articles Demonstrating CBD's Vascular Effects**

|                                         | Reference Article #               | Model                    | CBD Molecular/Cellular Interactions and Physiologic effects           | Anatomical Location/Cell Type Evaluated | Specific Pathology being Evaluated    | ROA             | Dosage         |
|-----------------------------------------|-----------------------------------|--------------------------|-----------------------------------------------------------------------|-----------------------------------------|---------------------------------------|-----------------|----------------|
| <b>Hemodynamics and Ca<sup>2+</sup></b> |                                   |                          |                                                                       |                                         |                                       |                 |                |
|                                         | Ryan, 2009. <sup>87</sup>         | Lister-Hooded Rats       | Bidirectional i[Ca <sup>2+</sup> ] modulation                         | Hippocampal Cells                       | N/A                                   | <i>in vitro</i> | 0.1, 1μM       |
|                                         |                                   | Lister-Hooded Rats       | prevent [Ca <sup>2+</sup> ] oscillations in high excitable state      | Hippocampal Cells                       | N/A                                   | <i>in vitro</i> | 0.1, 1μM       |
|                                         | Al Suleimani, 2015. <sup>88</sup> | Male Wistar Rats         | Vasorelaxation via Ca <sup>2+</sup> /K <sup>+</sup> Channels          | SMA Endothelial Cells                   | Methoxamine-induced vasoconstriction  | <i>ex vivo</i>  | 0.001-100μM    |
|                                         | MacIntyre, 2014. <sup>89</sup>    | Male Fischer 344 Rats    | Vasorelaxation via Ca <sup>2+</sup> /K <sup>+</sup> Channels          | Retinal Microvasculature                | Endothelin 1-induced vasoconstriction | <i>ex vivo</i>  | 10mM           |
|                                         | Wheal, 2014. <sup>90</sup>        | ZDF Rats                 | Vasorelaxation via COX1/2 and EP4 receptor mechanisms                 | Femoral Artery                          | Diabetes                              | <i>ex vivo</i>  | 10μM           |
| <b>Ischemia</b>                         |                                   |                          |                                                                       |                                         |                                       |                 |                |
|                                         | Hayakawa, 2008. <sup>52</sup>     | Male ddY Mice            | ↓Microglia activity, ↓HMBG1, ↓MPO activity                            | Brain                                   | Left MCA Occlusion                    | i.p.            | 0.1, 1, 3mg/kg |
|                                         | Hayakawa, 2009. <sup>81</sup>     | Male ddY Mice            | ↓HMBG1, ↓ischemic damage                                              | Brain                                   | Left MCA Occlusion                    | i.p.            | 3mg/kg         |
|                                         | Hayakawa, 2007. <sup>92</sup>     | Male ddy Mice            | ↑CBF, ↓MPO activity, no effect on glutamate excitotoxicity            | Brain                                   | MCA Occlusion                         | i.p.            | 1, 3mg/kg      |
|                                         | Yokubaitis, 2021. <sup>93</sup>   | C57B/6 Mice              | ↓infarct size, ↓Microglia activity                                    | Brain                                   | Cold light ischemia                   | i.p.            | 0.3, 1, 3mg/kg |
|                                         | Feng, 2015. <sup>94</sup>         | Rabbits                  | ↓lymphocyte infiltration, ↓apoptosis, ↑blood flow, ↑perfusion density | Myocardium                              | Ischemia/ reperfusion                 | i.v.            | 100μg/kg       |
|                                         | Walsh, 2010. <sup>95</sup>        | Male Sprague-Dawlet Rats | ↓arrythmias, ↓infarct size, ↓platelet aggregation                     | Myocardium                              | Coronary Artery Occlusion             | i.v.            | 10 or 50μg/kg  |

|  |                            |                  |                                                                  |            |                       |      |         |
|--|----------------------------|------------------|------------------------------------------------------------------|------------|-----------------------|------|---------|
|  | Gonca, 2015. <sup>96</sup> | Male Wistar Rats | ↓tachycardia,<br>↓arrhythmia length,<br>mediated via A1 receptor | Myocardium | Ischemia/ reperfusion | i.v. | 50μg/kg |
|--|----------------------------|------------------|------------------------------------------------------------------|------------|-----------------------|------|---------|



**Table OR3: Referenced Articles Demonstrating CBD's Neuroprotective Effects**

|                                | Reference Article #           | Model                | CBD Molecular/Cellular Interactions and Physiologic effects | Anatomical Location/Cell Type Evaluated | Specific Pathology being Evaluated | ROA             | Dosage        |
|--------------------------------|-------------------------------|----------------------|-------------------------------------------------------------|-----------------------------------------|------------------------------------|-----------------|---------------|
| <b>Excitotoxicity</b>          |                               |                      |                                                             |                                         |                                    |                 |               |
|                                | Pazos, 2013. <sup>72</sup>    | Newborn Pigs         | Prevented ↓ in GSH/Creatine ratio, ↓Glu/NAA ratio, ↓IL-1    | Brain                                   | Hypoxia-Ischemia                   | i.v.            | 1mg/kg        |
|                                | Castillo, 2010. <sup>73</sup> | Newborn C57BL6 Mice  | ↓Glutamate, ↓caspase 9, ↓IL-6, ↓TNF-α                       | Brain                                   | Hypoxia-Ischemia                   | <i>in vitro</i> | 0.1-1000μM    |
|                                | Hayakawa, 2007. <sup>92</sup> | Male ddy Mice        | ↑CBF, ↓MPO activity, no effect on glutamate excitotoxicity  | Brain                                   | MCA Occlusion                      | i.p.            | 1, 3mg/kg     |
|                                | Hampson, 1998. <sup>103</sup> | Newborn Wistar Rats  | ↓excitotoxicity, ↓H2O2 oxidative damage                     | Cortical Neuron Cultures                | Glutamate-induced excitotoxicity   | <i>in vitro</i> | 10μM          |
| <b>Reactive Oxygen Species</b> |                               |                      |                                                             |                                         |                                    |                 |               |
|                                | Malfait, 2000. <sup>24</sup>  | C57/BL Mice          | ↓IFN-γ, ↓TNF-α, ↓lymphocyte proliferation, ↓ROS             | Synovial Cells                          | Collagen-induced arthritis         | o.p. & i.p.     | 5, 25mg/kg    |
|                                | Rajesh, 2007. <sup>66</sup>   | Cultured Human Cells | ↓NF-κβ, ↓monocyte migration                                 | Human Coronary Artery Epithelial Cells  | High Glucose Exposure              | <i>in vitro</i> | 4μM, 0-6μM    |
|                                |                               | Cultured Human Cells | ↓superoxide, ↓VCAM-1, ↓ICAM-1                               | Human Coronary Artery Epithelial Cells  | High Glucose Exposure              | <i>in vitro</i> | 4μM, 0-6μM    |
|                                | Rajesh, 2010. <sup>67</sup>   | Male C57/BL6J Mice   | ↓ICAM-1, ↓VCAM-1, ↓TNF-α, ↓ROS, ↓caspase 3,                 | Myocardial Tissue                       | Type 1 Diabetic Cardiomyopathy     | i.p.            | 1,10, 20mg/kg |
|                                |                               | Cultured Human Cells | ↓superoxide generation, ↓NF-κβ, ↓apoptosis                  | Cardiomyocytes                          | High Glucose Exposure              | <i>in vitro</i> | 4μM           |
|                                | Pan, 2009. <sup>69</sup>      | C57/BL6J Mice        | ↓superoxide generation, ↓caspase 3, ↓DNA                    | Serum and Kidney                        | Nephrotoxicity                     | i.p.            | 2.5-10mg/kg   |

|                   |                                                   |                          |                                                                                                |                          |                                  |                 |                    |
|-------------------|---------------------------------------------------|--------------------------|------------------------------------------------------------------------------------------------|--------------------------|----------------------------------|-----------------|--------------------|
|                   |                                                   |                          | fragmentation, ↓TNF- $\alpha$ ,<br>↓IL-1 $\beta$                                               |                          |                                  |                 |                    |
|                   | Pazos, 2013. <sup>72</sup>                        | Newborn Pigs             | Prevented ↓ in GSH/Creatine ratio, ↓Glu/NAA ratio, ↓IL-1                                       | Brain                    | Hypoxia-Ischemia                 | i.v.            | 1mg/kg             |
|                   | Fouad, 2011. <sup>79</sup>                        | Male Sprague-Dawley Rats | ↓ TNF- $\alpha$ , ↓lipid peroxidation, prevented ↓ in glutathione                              | Liver                    | ischemia/Reperfusion             | i.v.            | 5mg/kg             |
|                   | Hampson, 1998. <sup>103</sup>                     | Newborn Wistar Rats      | ↓excitotoxicity, ↓H2O2 oxidative damage                                                        | Cortical Neuron Cultures | Glutamate-induced excitotoxicity | <i>in vitro</i> | 10 $\mu$ M         |
| <b>Cell Death</b> |                                                   |                          |                                                                                                |                          |                                  |                 |                    |
|                   | Mukhopadhyay, 2011. <sup>65</sup>                 | Male C57/BL6J Mice       | ↓NF- $\kappa$ $\beta$ , ↓TNF- $\alpha$ , ↓ICAM-1, ↓neutrophil infiltration, ↓DNA fragmentation | Liver                    | Ischemia/Reperfusion             | i.p.            | 3, 10mg/kg         |
|                   | Rajesh, 2010. <sup>67</sup>                       | Male C57/BL6J Mice       | ↓ICAM-1, ↓VCAM-1, ↓TNF- $\alpha$ , ↓ROS, ↓caspase-3,                                           | Myocardial Tissue        | Type 1 Diabetic Cardiomyopathy   | i.p.            | 1,10, 20mg/kg      |
|                   |                                                   | Cultured Human Cells     | ↓superoxide generation, ↓NF- $\kappa$ $\beta$ , ↓apoptosis                                     | Cardiomyocytes           | High Glucose Exposure            | <i>in vitro</i> | 4 $\mu$ M          |
|                   | Pan, 2009. <sup>69</sup>                          | C57/BL6J Mice            | ↓superoxide generation, ↓caspase-3, ↓DNA fragmentation, ↓TNF- $\alpha$ , ↓IL-1 $\beta$         | Serum and Kidney         | Nephrotoxicity                   | i.p.            | 2.5-10mg/kg        |
|                   | Castillo, 2010. <sup>73</sup>                     | Newborn C57BL6 Mice      | ↓Glutamate, ↓caspase-9, ↓IL-6, ↓TNF- $\alpha$                                                  | Brain                    | Hypoxia-Ischemia                 | <i>in vitro</i> | 0.1-1000 $\mu$ M   |
|                   | Fouad, 2011. <sup>79</sup>                        | Male Sprague-Dawley Rats | ↓ TNF- $\alpha$ , ↓lipid peroxidation, prevented ↓ in glutathione                              | Liver                    | ischemia/Reperfusion             | i.v.            | 5mg/kg             |
|                   | Abrantes De Lacerda Almeida, 2019. <sup>121</sup> | Wester Rats              | ↓astrocyte reactivity, ↓apoptotic cells, ↓Caspase-3                                            | Brain                    | Germinal Matrix Hemorrhage       | i.p.            | 1mg, 10mg, 10mg/kg |
